# Supplementary material
Source: publisher site journal article supplement (https://www.dovepress.com/article/381188)
Supplement: Supplementary file 1 [file get_supplementary_file.php]

**
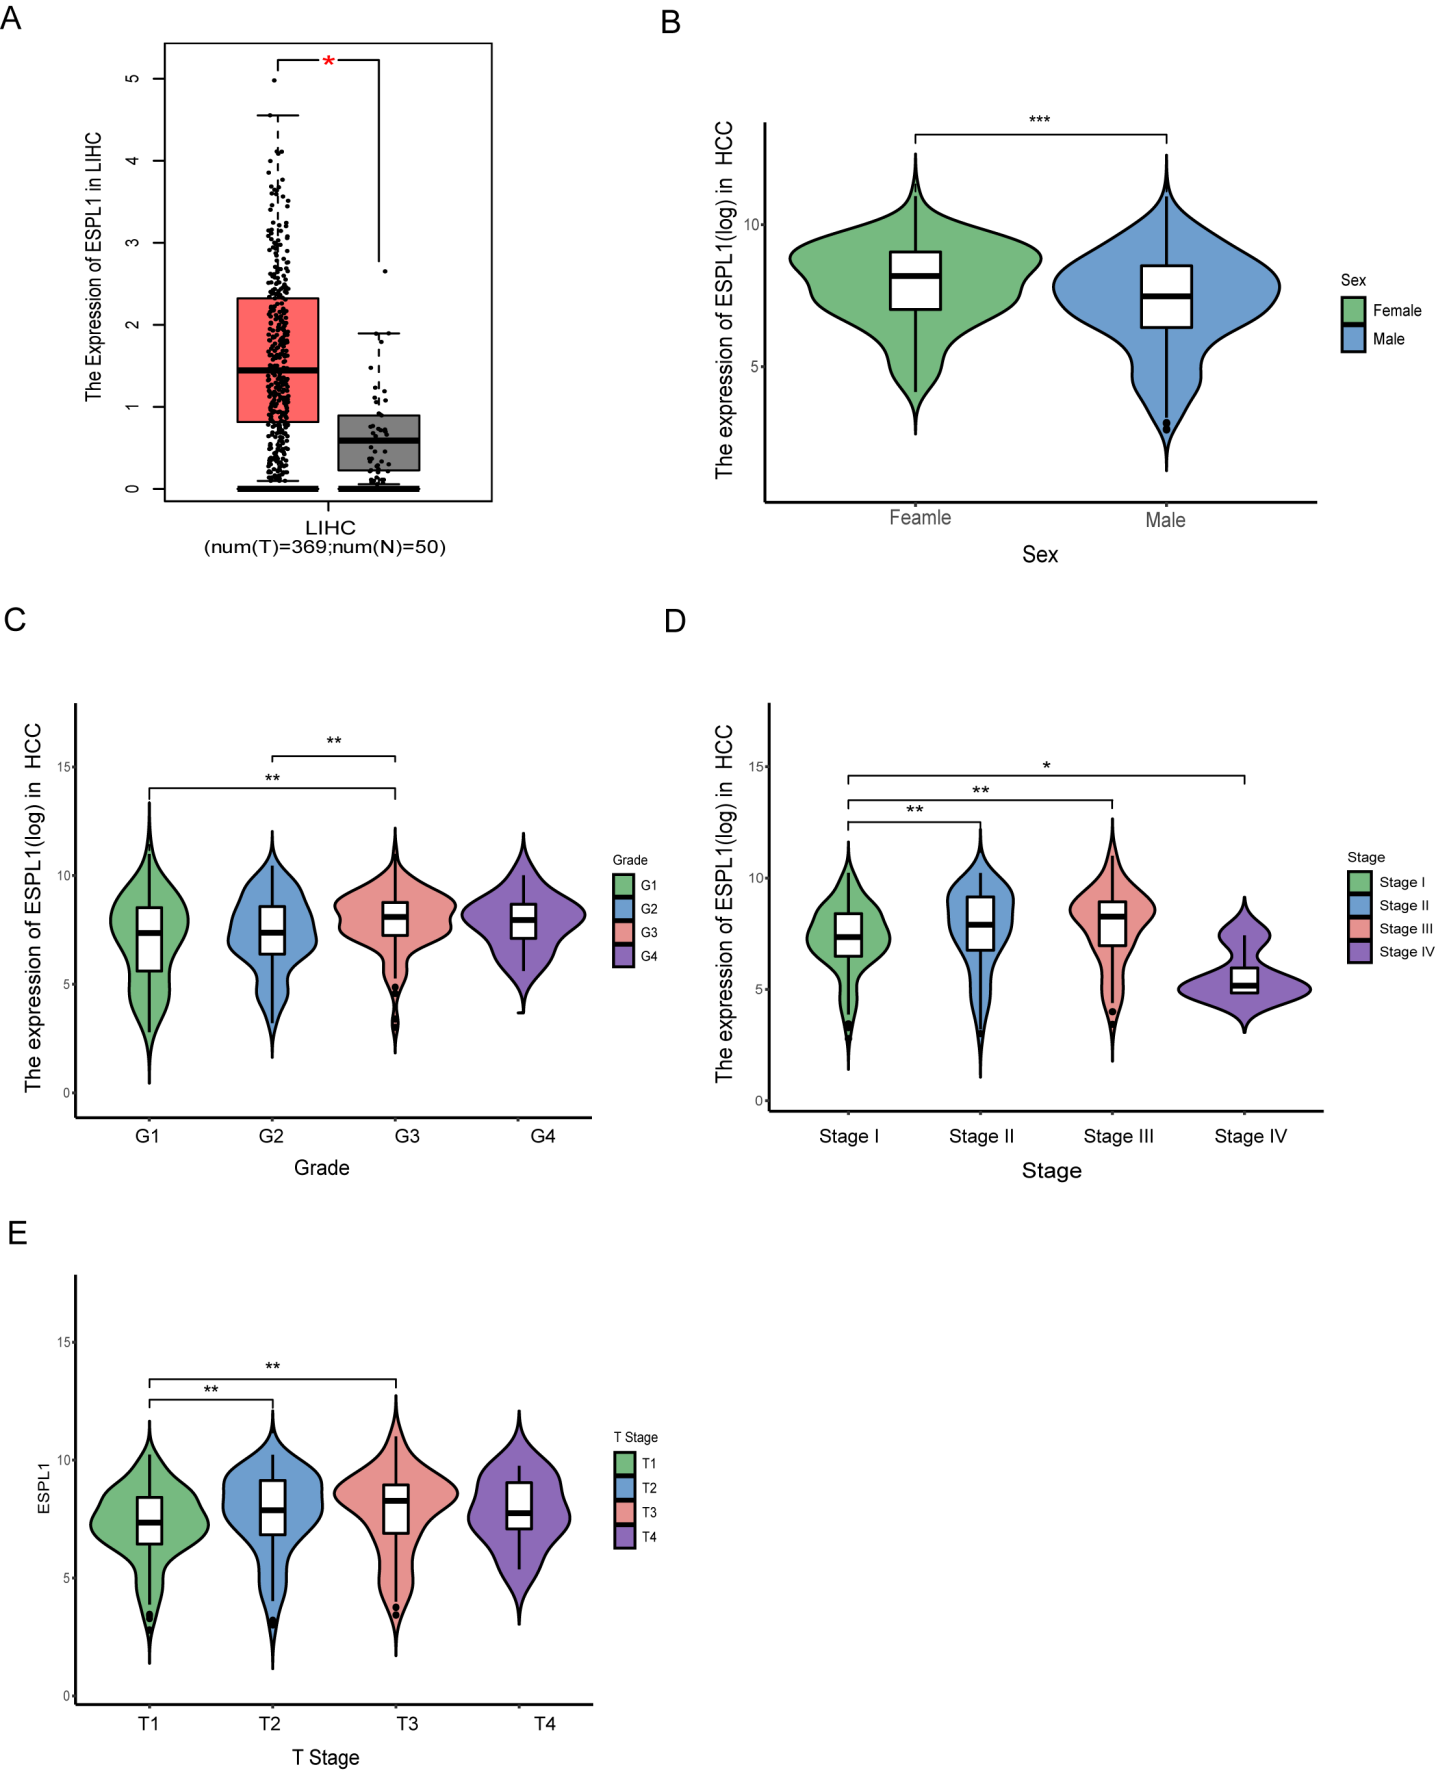
**

**Supplemental Figure 1.** *ESPL1* mRNA expression in HCCs in the TCGA database: (**A**) *ESPL1* expression levels in tumors and adjacent normal tissues. (**B-E**) Associations of *ESPL1* expression and clinical characteristics of HCC patients. ***, *P* < 0.001; **, *P* < 0.01; *, *P* < 0.05.

**Abbreviations:** *ESPL1,* extra spindle pole bodies-like 1; HCC, hepatocellular carcinoma

**
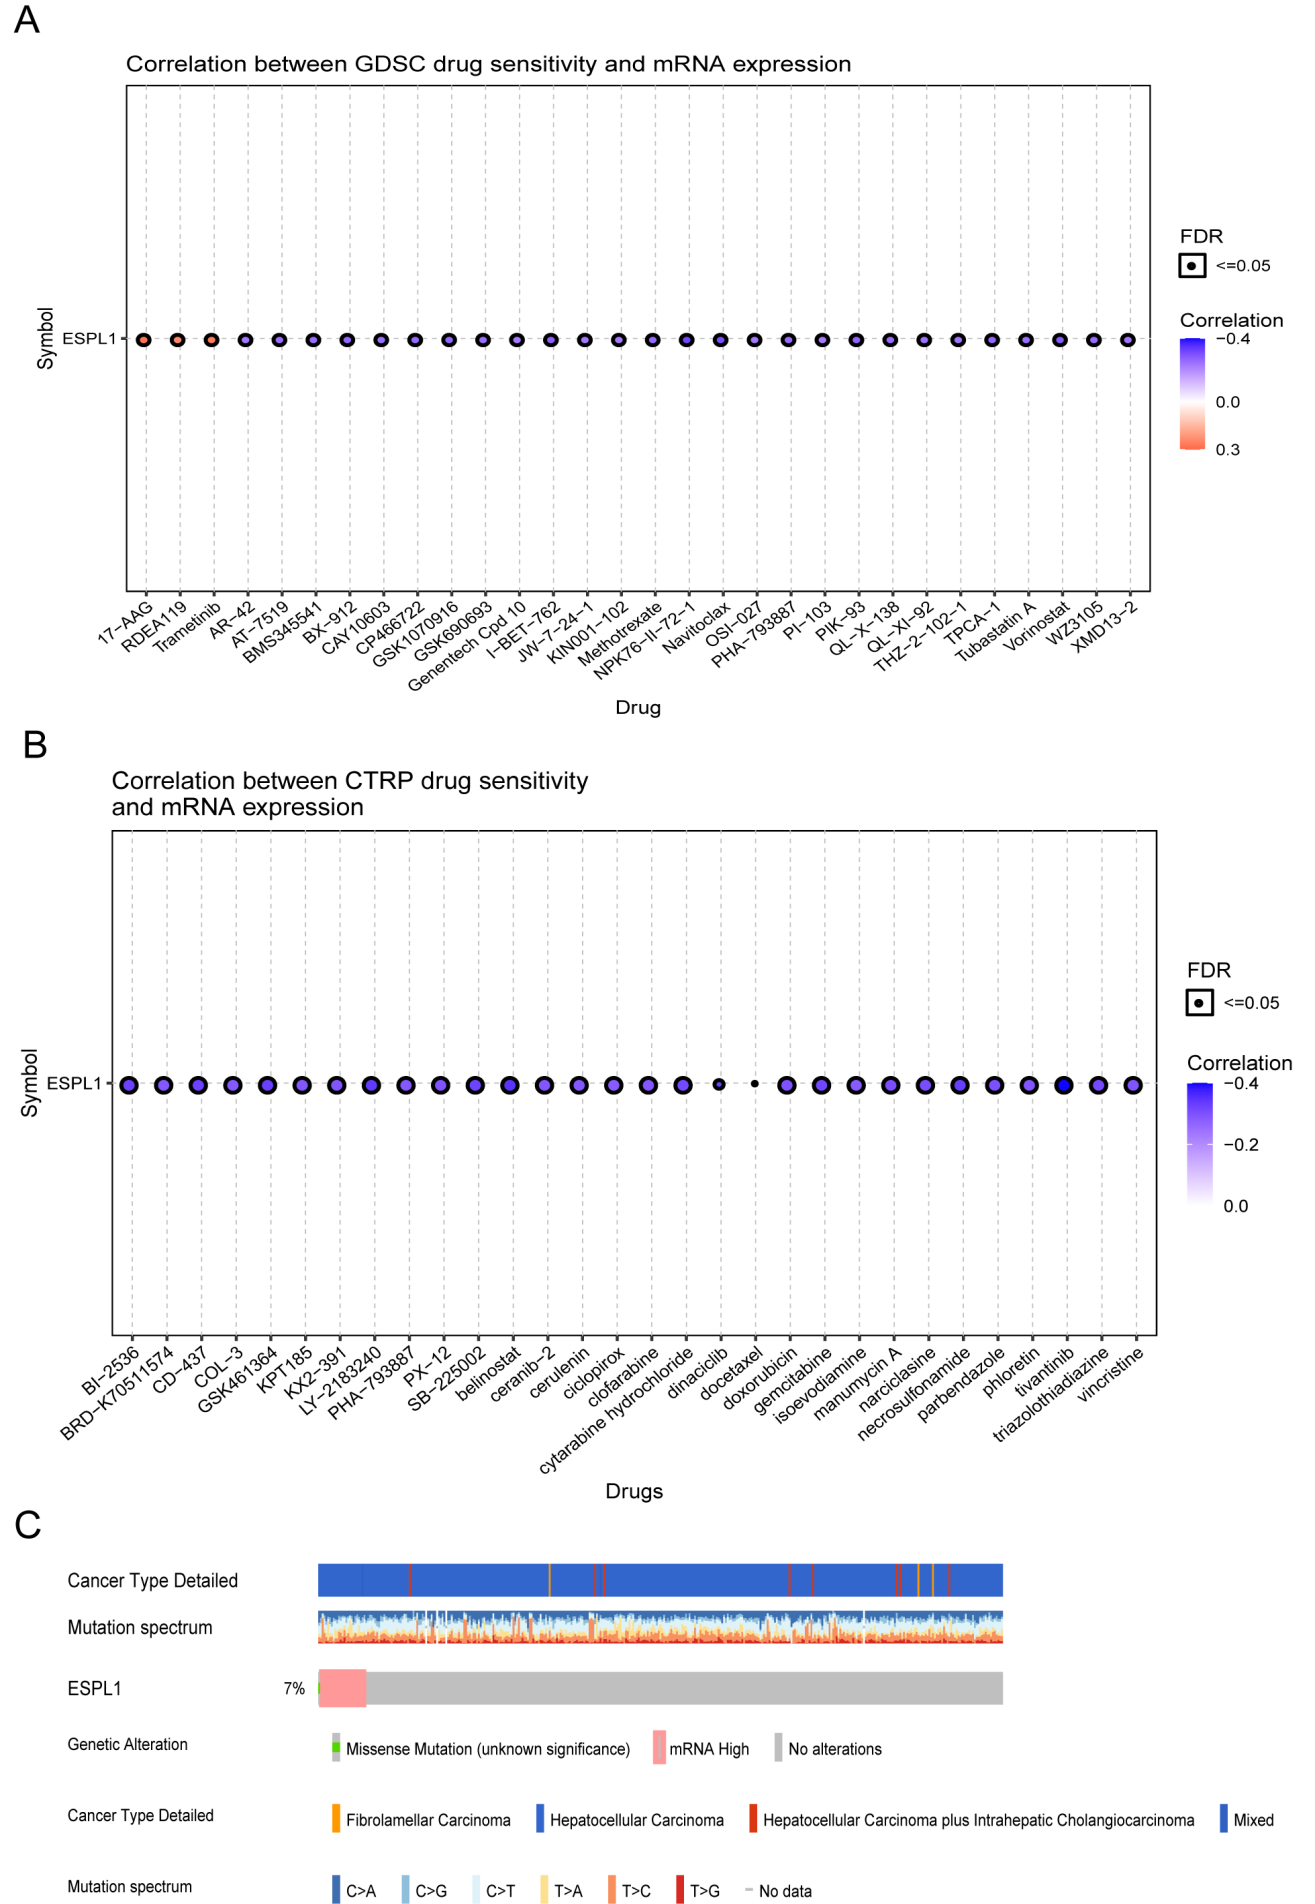
**

**Supplemental Figure 2.** (**A-B**) Relationship between *ESPL1* and pan-cancer drug sensitivity based on GSCA. (**C**) *ESPL1* mutations based on cBioPortal.

**Abbreviations:** GSCA, gene set cancer analysis; *ESPL1,* extra spindle pole bodies-like 1

**
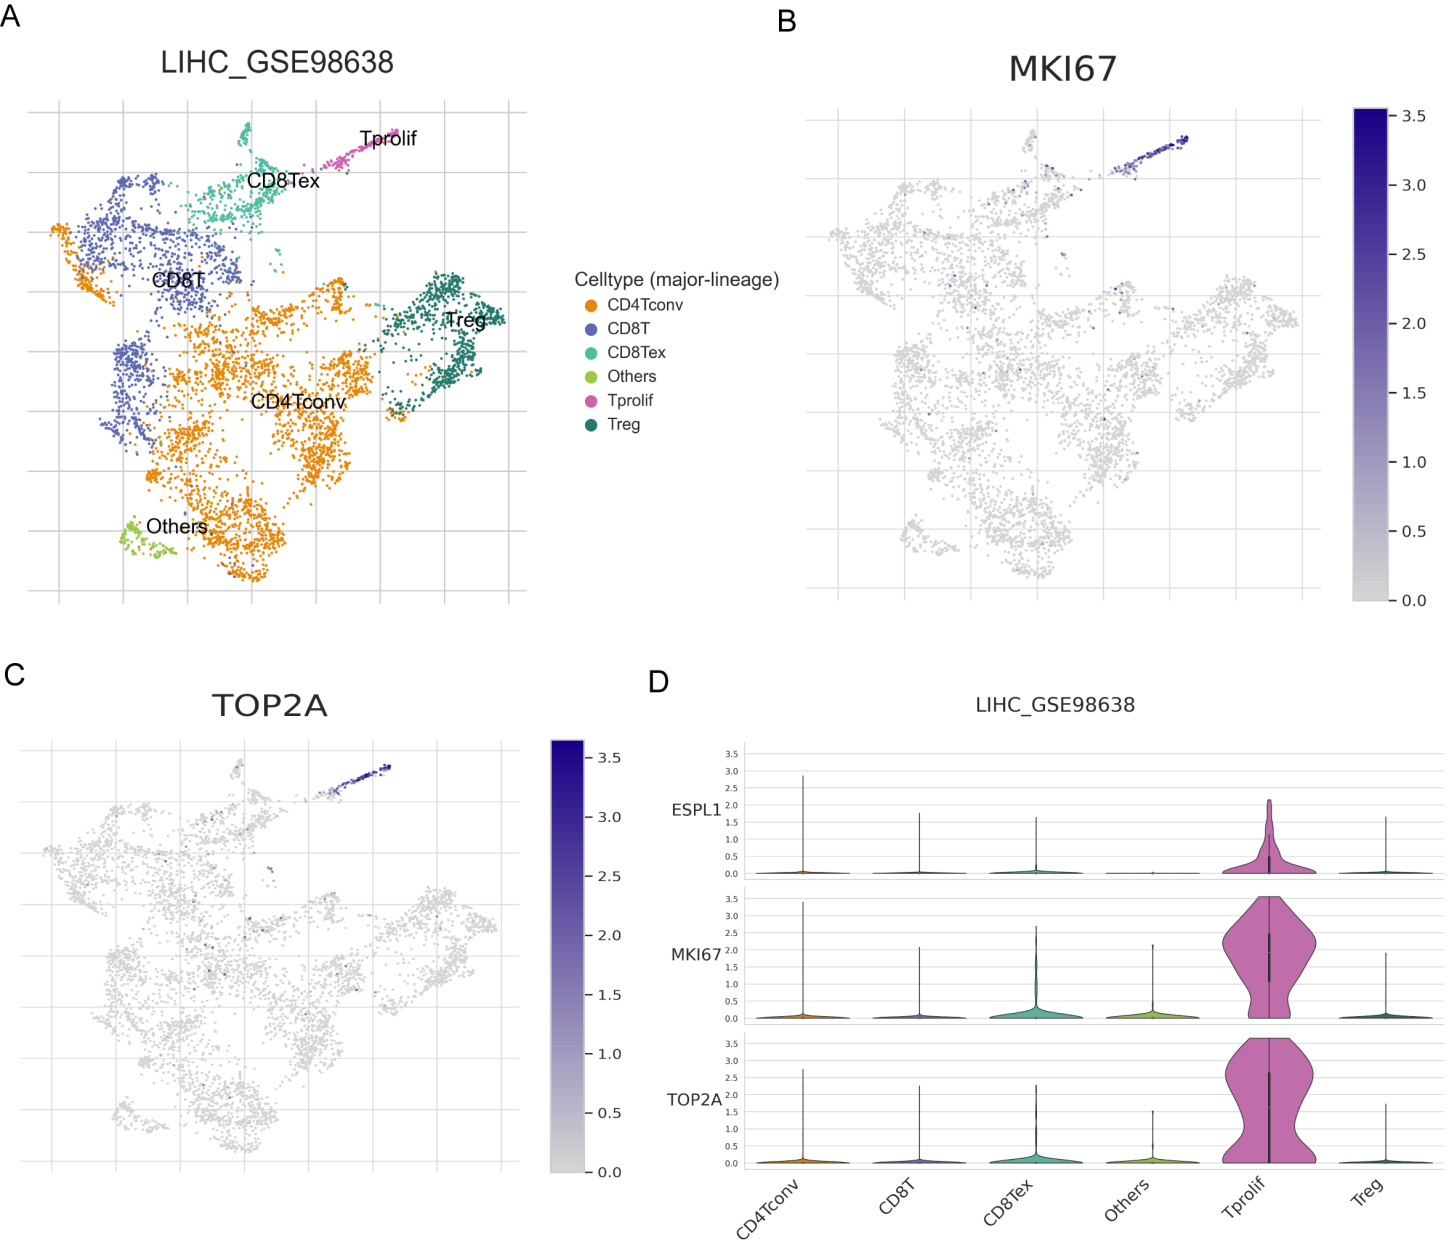
**

**Supplemental Figure 3.** **(A-C)** UMAP and **(D)** violin plots showing the expression of marker genes for proliferating T cells in the GSE98638 cohort.

**Table S1 Baseline characteristics of HCC patients in TCGA cohort**

| Variable | N (%) |
| --- | --- |
| Sex |  |
| Male | 246 (67.3%)  119 (32.7%) |
| Female |
| Age (years) |  |
| ≤65 | 227 (62.1%)  138 (37.9%) |
| >65 |
| Tumor stage |  |
| I+II | 254 (69.6%)  87 (23.8%) |
| III+IV |
| Missinga | 24 (6.6%) |
| Grade |  |
| G1+G2 | 230 (63.0%)  130 (35.6%) |
| G3+G4 |
| Missingb | 5 (1.4%) |
| T stage |  |
| T1+T2  T3+T4 | 271 (74.2%)  91 (25.0%) |
| Missingc | 3 (0.8%) |
| N stage |  |
| N0 | 248 (68.0%)  4 (1.1%) |
| N1 |
| NX | 112 (30.7%) |
| Missingd | 1 (0.2%) |
| M stage |  |
| M0  M1 | 263 (72.1%)  3 (0.8%) |
| MX | 99 (27.1%) |

**Note：**aMissing, information of tumor stage was unknown in 24 patients; bMissing, information of Grade was unknown in 5 patients; cMissing, information of T stage was unknown in 3 patients; dMissing, information of N stage was unknown in 1 patient.

**Table S2 Univariate and multivariable analysis of the *ESPL1* gene and clinical parameters for OS in TCGA-LIHC database**

| Variable | Univariate | | Multivariate | |
| --- | --- | --- | --- | --- |
| HR (95%CI) | *P* | HR (95%CI) | *P* |
| *ESPL1* (high) | 1.702 (1.197-2.419) | **0.003** | 1.757 (1.186-2.605) | **0.005** |
| Sex (Male) | 0.815 (0.572-1.161) | 0.257 |  |  |
| Age (＞65years) | 1.269 (0.896-1.796) | 0.180 |  |  |
| T stage(T3+T4) | 2.539 (1.784-3.611) | **<0.001** | 3.392 (0.204-56.427) | 0.394 |
| N stage |  |  |  |  |
| N1  NX | 2.108 (0.516-8.609)  1.495 (1.032-2.166) | 0.299  **0.034** | 3.452 (0.467-25.497)  1.283 (0.731-2.253) | 0.225  0.385 |
| M stage |  |  |  |  |
| M1  MX | 4.279 (1.345-13.614)  1.606 (1.106-2.333) | **0.014**  **0.013** | 3.352 (0.997-11.267)  1.416 (0.808-2.482) | 0.051  0.224 |
| Tumor Stage(III+IV) | 2.448 (1.689-3.548) | **<0.001** | 0.686 (0.040-11.630) | 0.794 |
| Grade (G3+G4) | 1.120 (0.781-1.606) | 0.539 |  |  |

**Abbreviations：**95 % CI, 95 % confidence interval; HR, hazards ratio; OS, overall survival; *ESPL1:* extra spindle pole bodies-like 1

**Table S4 GO enrichment analysis**

**Table S5 KEGG pathway**
